# Supplementary material
Source: Research Square preprint supplement (doi:10.21203/rs.3.rs-9452907/v1)
Supplement: Supplementary file 1 [file a7fcb82586aa263b4b168247.pdf]

## CASE REPORT FORM

### 1. Inclusion / Exclusion Criteria (NOTE: Please use a ✓ )

#### 1.1 Inclusion Criteria

Informed consent obtained

#### 1.2 Exclusion Criteria

Any condition that, in the opinion of the investigator, would complicate or compromise the study or well being of the patient.

### 2. Demographic Information at Enrolment

Date of enrolment [ ]/[ ]/[ ] dd/mm/yy

Age in year [ ]

Sex  Male  Female

*If female, does the patient have a known pregnancy?*  yes  no

Weight on enrolment [ ] kg Height [ ] cm

Body Mass Index (BMI) [ ] / [ ] kg/m<sup>2</sup>

#### 2.1 Vital Signs

Temperature [ ] °C

Blood pressure (systolic) [ ] /mmHg

(diastolic) [ ] /mmHg

Pulse [ ] per minute

Respiratory rate\* [ ] per minute \*after rested at least 5 minutes

### 3. CLINICAL DEFINITION OF DENGUE (DK="don't know")

| Medical Condition                                | Y/N/DK | Severity<br>(1-3=mild, 4-7=moderate, 8-10 severe) | Days present |
|--------------------------------------------------|--------|---------------------------------------------------|--------------|
| Malaise                                          |        | Severity ____                                     |              |
| Flushing                                         |        | Severity ____                                     |              |
| Vomiting <i>If yes, number of episodes</i> ____  |        |                                                   |              |
| Nausea                                           |        | Severity ____                                     |              |
| Diarrhoea <i>If yes, number of episodes</i> ____ |        |                                                   |              |
| Muscle pain                                      |        | Severity ____                                     |              |

|                                                                                                                                                                                                                                                                                                                                                                                                                                                                                                                                         |  |               |  |
|-----------------------------------------------------------------------------------------------------------------------------------------------------------------------------------------------------------------------------------------------------------------------------------------------------------------------------------------------------------------------------------------------------------------------------------------------------------------------------------------------------------------------------------------|--|---------------|--|
| Joint pain                                                                                                                                                                                                                                                                                                                                                                                                                                                                                                                              |  | Severity ____ |  |
| Retroorbital pain                                                                                                                                                                                                                                                                                                                                                                                                                                                                                                                       |  | Severity ____ |  |
| Rash<br><i>If yes, please indicate below:</i><br><input type="checkbox"/> maculopapular <input type="checkbox"/> erythematous                                                                                                                                                                                                                                                                                                                                                                                                           |  | Severity ____ |  |
| Headache                                                                                                                                                                                                                                                                                                                                                                                                                                                                                                                                |  | Severity ____ |  |
| Conjunctivitis                                                                                                                                                                                                                                                                                                                                                                                                                                                                                                                          |  | Severity ____ |  |
| Bleeding<br><i>If yes, please indicate below:</i><br><input type="checkbox"/> gums <input type="checkbox"/> nose<br><input type="checkbox"/> Ecchymosis <input type="checkbox"/> epistaxis<br><input type="checkbox"/> GI <input type="checkbox"/> petechiae<br><input type="checkbox"/> Vaginal <input type="checkbox"/> other, _____<br><input type="checkbox"/> Urinary tract                                                                                                                                                        |  |               |  |
| Edema<br><i>If yes, please indicate below:</i><br>(1=periph.; 2=facial; 3=peri+fac.)<br><input type="checkbox"/> no <input type="checkbox"/> yes <input type="checkbox"/> unclear/not assessed<br><i>If 'yes', code <input type="checkbox"/></i>                                                                                                                                                                                                                                                                                        |  |               |  |
| Fever<br><i>If yes, please indicate below:</i><br>Temperature <input type="checkbox"/> <input type="checkbox"/> . <input type="checkbox"/> °C<br>Date of fever onset:<br><input type="checkbox"/> <input type="checkbox"/> / <input type="checkbox"/> <input type="checkbox"/> / <input type="checkbox"/> <input type="checkbox"/> dd/mm/yy<br>Time of fever onset:<br><input type="checkbox"/> <input type="checkbox"/> : <input type="checkbox"/> <input type="checkbox"/> hh:mm<br>Number of days of fever at the time of enrollment |  |               |  |
| Respiratory distress<br>Comments (if any) _____                                                                                                                                                                                                                                                                                                                                                                                                                                                                                         |  |               |  |
| Chest pain / discomfort                                                                                                                                                                                                                                                                                                                                                                                                                                                                                                                 |  | Severity ____ |  |
| Abdominal pain / discomfort                                                                                                                                                                                                                                                                                                                                                                                                                                                                                                             |  | Severity ____ |  |
| Ascites<br>Comments (if any) _____                                                                                                                                                                                                                                                                                                                                                                                                                                                                                                      |  |               |  |
| Liver enlargement >2cm                                                                                                                                                                                                                                                                                                                                                                                                                                                                                                                  |  |               |  |
| Pleural effusion<br>Comments (if any) _____                                                                                                                                                                                                                                                                                                                                                                                                                                                                                             |  |               |  |
| Neurological Symptoms (rare)<br>If yes, _____ (symptom)                                                                                                                                                                                                                                                                                                                                                                                                                                                                                 |  | Severity ____ |  |

|                                                                                                                                                                                                          |  |  |  |
|----------------------------------------------------------------------------------------------------------------------------------------------------------------------------------------------------------|--|--|--|
| <input type="checkbox"/> impaired consciousness                                                                                                                                                          |  |  |  |
| <input type="checkbox"/> lethargy <input type="checkbox"/> restlessness                                                                                                                                  |  |  |  |
| <b>3.1 Medications for dengue</b>                                                                                                                                                                        |  |  |  |
| Has the patient taken any medications for dengue? <input type="checkbox"/> yes <input type="checkbox"/> no                                                                                               |  |  |  |
| If yes, _____ (drug) _____ (dose) <input type="checkbox"/> <input type="checkbox"/> <input type="checkbox"/> <input type="checkbox"/> <input type="checkbox"/> <input type="checkbox"/> (date, dd/mm/yy) |  |  |  |
| _____ (drug) _____ (dose) <input type="checkbox"/> <input type="checkbox"/> <input type="checkbox"/> <input type="checkbox"/> <input type="checkbox"/> <input type="checkbox"/> (date, dd/mm/yy)         |  |  |  |
| _____ (drug) _____ (dose) <input type="checkbox"/> <input type="checkbox"/> <input type="checkbox"/> <input type="checkbox"/> <input type="checkbox"/> <input type="checkbox"/> (date, dd/mm/yy)         |  |  |  |
| Was the patient administered parenteral fluid? <input type="checkbox"/> no <input type="checkbox"/> yes                                                                                                  |  |  |  |
| If 'yes': <input type="checkbox"/> <input type="checkbox"/> <input type="checkbox"/> <input type="checkbox"/> ml    For maintenance only? <input type="checkbox"/> yes    Type: _____                    |  |  |  |
| For rehydration? <input type="checkbox"/> yes    ( <i>crystalloid, colloid, blood, plasma, etc.</i> )                                                                                                    |  |  |  |
| For shock resuscitation? <input type="checkbox"/> yes                                                                                                                                                    |  |  |  |

**4. Past Medical History (DK="don't know"). (NOTE: Please use a ✓ )**

| Medical condition                                                       | YES | NO | DK | Medical condition                                  | YES | NO | DK |
|-------------------------------------------------------------------------|-----|----|----|----------------------------------------------------|-----|----|----|
| Asthma                                                                  |     |    |    | Seasonal or environmental allergies                |     |    |    |
|                                                                         |     |    |    | <input type="checkbox"/> animals                   |     |    |    |
| Diabetes                                                                |     |    |    | <input type="checkbox"/> dust                      |     |    |    |
|                                                                         |     |    |    | <input type="checkbox"/> mold                      |     |    |    |
| Food allergy                                                            |     |    |    | <input type="checkbox"/> pollen                    |     |    |    |
| <i>If yes, to what food?</i>                                            |     |    |    | <input type="checkbox"/> other, _____              |     |    |    |
| _____                                                                   |     |    |    | <input type="checkbox"/> Don't know allergen       |     |    |    |
| Allergy to insect bites                                                 |     |    |    | Chronic inflammatory disorder of the skin          |     |    |    |
|                                                                         |     |    |    | <input type="checkbox"/> chronic urticaria         |     |    |    |
|                                                                         |     |    |    | <input type="checkbox"/> eczema                    |     |    |    |
|                                                                         |     |    |    | <input type="checkbox"/> contact dermatitis        |     |    |    |
|                                                                         |     |    |    | <input type="checkbox"/> psoriasis                 |     |    |    |
| Drug allergy                                                            |     |    |    | Others                                             |     |    |    |
| <i>If yes, to what drug?</i>                                            |     |    |    | <i>If 'Yes', please specify:</i>                   |     |    |    |
| _____                                                                   |     |    |    | _____                                              |     |    |    |
| Anaphylaxis requiring hospitalization or family history of anaphylaxis? |     |    |    | Inflammatory bowel disease                         |     |    |    |
| If yes                                                                  |     |    |    | <input type="checkbox"/> colitis                   |     |    |    |
| <input type="checkbox"/> patient                                        |     |    |    | <input type="checkbox"/> Crohn's disease           |     |    |    |
| <input type="checkbox"/> mother                                         |     |    |    | <input type="checkbox"/> other, _____              |     |    |    |
| <input type="checkbox"/> father                                         |     |    |    |                                                    |     |    |    |
| <input type="checkbox"/> grandparent                                    |     |    |    |                                                    |     |    |    |
| <input type="checkbox"/> sibling                                        |     |    |    |                                                    |     |    |    |
| Hospitalization due to dengue                                           |     |    |    | Previous diagnosis of laboratory confirmed dengue? |     |    |    |

|  |  |  |  |                                                  |  |  |  |
|--|--|--|--|--------------------------------------------------|--|--|--|
|  |  |  |  | <i>If yes, date(s) of diagnosis</i><br>_____     |  |  |  |
|  |  |  |  | <i>If yes, location(s) of diagnosis</i><br>_____ |  |  |  |

**5. Baseline Measures**

|                   |       |                      |                                        |
|-------------------|-------|----------------------|----------------------------------------|
| White Blood Count | _____ | x10 <sup>9</sup> /L  | <input type="checkbox"/> Not Collected |
| Serum Creatinine  | _____ | umol/L               | <input type="checkbox"/> Not Collected |
| Hemoglobin        | _____ | g/dL                 | <input type="checkbox"/> Not Collected |
| Platelet Count    | _____ | x10 <sup>9</sup> /L  | <input type="checkbox"/> Not Collected |
| RBC count         | _____ | x10 <sup>12</sup> /L | <input type="checkbox"/> Not Collected |
| Neutrophil count  | _____ | x10 <sup>9</sup> /L  | <input type="checkbox"/> Not Collected |
| Monocyte count    | _____ | x10 <sup>9</sup> /L  | <input type="checkbox"/> Not Collected |
| Lymphocyte count  | _____ | x10 <sup>9</sup> /L  | <input type="checkbox"/> Not Collected |
| Eosinophil count  | _____ | x10 <sup>9</sup> /L  | <input type="checkbox"/> Not Collected |
| Basophil count    | _____ | x10 <sup>9</sup> /L  | <input type="checkbox"/> Not Collected |
| Hematocrit        | _____ | %                    | <input type="checkbox"/> Not Collected |
| AST               | _____ | U/L                  | <input type="checkbox"/> Not Collected |
| ALT               | _____ | U/L                  | <input type="checkbox"/> Not Collected |

**6. Laboratory Confirmation of Dengue**

| PCR                                                                                   | NS1                                                                                   | IgM                                                                                   | IgG                                                                                   |
|---------------------------------------------------------------------------------------|---------------------------------------------------------------------------------------|---------------------------------------------------------------------------------------|---------------------------------------------------------------------------------------|
| <input type="checkbox"/> +ve <input type="checkbox"/> -ve <input type="checkbox"/> ND | <input type="checkbox"/> +ve <input type="checkbox"/> -ve <input type="checkbox"/> ND | <input type="checkbox"/> +ve <input type="checkbox"/> -ve <input type="checkbox"/> ND | <input type="checkbox"/> +ve <input type="checkbox"/> -ve <input type="checkbox"/> ND |

**7. Return Visit Questionnaire (Study Day 4-5) (DK="don't know")**

Today's Date [ ]/[ ]/[ ] dd/mm/yy

| Medical Condition                                | Y/N/DK | Severity<br>(1-4=mild, 4-7=moderate, 8-10 severe) | Days present |
|--------------------------------------------------|--------|---------------------------------------------------|--------------|
| Malaise                                          |        | Severity ____                                     |              |
| Flushing                                         |        | Severity ____                                     |              |
| Vomiting <i>If yes, number of episodes</i> ____  |        |                                                   |              |
| Nausea                                           |        | Severity ____                                     |              |
| Diarrhoea <i>If yes, number of episodes</i> ____ |        |                                                   |              |
| Muscle pain                                      |        | Severity ____                                     |              |
| Joint pain                                       |        | Severity ____                                     |              |
| Retroorbital pain                                |        | Severity ____                                     |              |
| Rash                                             |        | Severity ____                                     |              |

|                                                                                                                                                                                                                                                                                                                                                                                                                                                                                    |  |               |  |
|------------------------------------------------------------------------------------------------------------------------------------------------------------------------------------------------------------------------------------------------------------------------------------------------------------------------------------------------------------------------------------------------------------------------------------------------------------------------------------|--|---------------|--|
| <i>If yes, please indicate below:</i><br><input type="checkbox"/> maculopapular <input type="checkbox"/> erythematous                                                                                                                                                                                                                                                                                                                                                              |  |               |  |
| Headache                                                                                                                                                                                                                                                                                                                                                                                                                                                                           |  | Severity ____ |  |
| Conjunctivitis                                                                                                                                                                                                                                                                                                                                                                                                                                                                     |  | Severity ____ |  |
| Bleeding<br><i>If yes, please indicate below:</i><br><input type="checkbox"/> gums <input type="checkbox"/> nose<br><input type="checkbox"/> Ecchymosis <input type="checkbox"/> epistaxis<br><input type="checkbox"/> GI <input type="checkbox"/> petechiae<br><input type="checkbox"/> Vaginal <input type="checkbox"/> other, _____<br><input type="checkbox"/> Urinary tract                                                                                                   |  |               |  |
| Edema<br><i>If yes, please indicate below:</i><br>(1=periph.; 2=facial; 3=peri+fac.)<br><input type="checkbox"/> no <input type="checkbox"/> yes <input type="checkbox"/> unclear/not assessed<br><i>If 'yes', code</i> <input type="checkbox"/>                                                                                                                                                                                                                                   |  |               |  |
| Fever<br><i>If yes, please indicate below:</i><br>Temperature <input type="checkbox"/> <input type="checkbox"/> . <input type="checkbox"/> °C<br>Date of fever onset:<br><input type="checkbox"/> <input type="checkbox"/> / <input type="checkbox"/> <input type="checkbox"/> / <input type="checkbox"/> <input type="checkbox"/> dd/mm/yy<br>Time of fever onset:<br><input type="checkbox"/> <input type="checkbox"/> : <input type="checkbox"/> <input type="checkbox"/> hh:mm |  |               |  |
| Respiratory distress<br>Comments (if any) _____                                                                                                                                                                                                                                                                                                                                                                                                                                    |  |               |  |
| Chest pain / discomfort                                                                                                                                                                                                                                                                                                                                                                                                                                                            |  | Severity ____ |  |
| Abdominal pain / discomfort                                                                                                                                                                                                                                                                                                                                                                                                                                                        |  | Severity ____ |  |
| Ascites<br>Comments (if any) _____                                                                                                                                                                                                                                                                                                                                                                                                                                                 |  |               |  |
| Liver enlargement >2cm                                                                                                                                                                                                                                                                                                                                                                                                                                                             |  |               |  |
| Pleural effusion<br>Comments (if any) _____                                                                                                                                                                                                                                                                                                                                                                                                                                        |  |               |  |
| Neurological Symptoms (rare)<br>If yes, _____ (symptom)<br><input type="checkbox"/> impaired consciousness<br><input type="checkbox"/> lethargy <input type="checkbox"/> restlessness                                                                                                                                                                                                                                                                                              |  | Severity ____ |  |
| <b>3.1 Medications for dengue</b>                                                                                                                                                                                                                                                                                                                                                                                                                                                  |  |               |  |
| Has the patient taken any medications for dengue? <input type="checkbox"/> yes <input type="checkbox"/> no                                                                                                                                                                                                                                                                                                                                                                         |  |               |  |
| If yes, _____ (drug) _____ (dose) <input type="checkbox"/> <input type="checkbox"/> / <input type="checkbox"/> <input type="checkbox"/> / <input type="checkbox"/> <input type="checkbox"/> (date, dd/mm/yy)                                                                                                                                                                                                                                                                       |  |               |  |
| _____ (drug) _____ (dose) <input type="checkbox"/> <input type="checkbox"/> / <input type="checkbox"/> <input type="checkbox"/> / <input type="checkbox"/> <input type="checkbox"/> (date, dd/mm/yy)                                                                                                                                                                                                                                                                               |  |               |  |
